## MERTIL FOR PARENTS: A STUDY PROTOCOL

1 **Full title:** My Early Relational Trust-Informed Learning (MERTIL) for Parents: A study  
2 protocol for a brief, universal, online, preventative parenting program to enhance relational  
3 health.

4 **Short title:** MERTIL for Parents: A study protocol

5

6 Jessica Opie <sup>a\*#</sup>, Leesa Hooker <sup>b,c</sup>, Tanudja Gibson <sup>a</sup>, Jennifer McIntosh <sup>a</sup>

7 <sup>a</sup> School of Psychology & Public Health, La Trobe University, Melbourne, Australia, 3056.

8 <sup>b</sup> Judith Lumley Centre, School of Nursing and Midwifery, La Trobe University, Melbourne,  
9 Australia, 3056

10 <sup>c</sup> La Trobe Rural Health School, La Trobe University, Bendigo, Australia, 3552.

11

12 \* Correspondence for this article should be addressed to Jessica E. Opie:

13 [j.opie@latrobe.edu.au](mailto:j.opie@latrobe.edu.au)

14 # Current address: The Bouverie Centre, School of Psychology & Public Health, La Trobe  
15 University, 8 Gardiner Street, Brunswick 3056, Victoria Australia.

16

17 \*Jessica E. Opie: [j.opie@latrobe.edu.au](mailto:j.opie@latrobe.edu.au)

18 Leesa Hooker: [l.hooker@latrobe.edu.au](mailto:l.hooker@latrobe.edu.au)

19 Tanudja Gibson: [t.gibson@latrobe.edu.au](mailto:t.gibson@latrobe.edu.au)

20 Jennifer E McIntosh: [jenn.mcintosh@latrobe.edu.au](mailto:jenn.mcintosh@latrobe.edu.au)

21

22 Jessica E. Opie: <https://orcid.org/0000-0002-0559-0842>

23 Leesa Hooker: <https://orcid.org/0000-0002-4499-1139>

24 Tanudja Gibson:

25 Jennifer E McIntosh: <https://orcid.org/0000-0003-4709-5003>

26

27 Ethics approval: This study has been approved by the Human Research Ethics Committee at  
28 La Trobe University (HEC: 22096).

29

30 Conflict of interest: No conflicts or competing interests to disclose.

31

32 Funding: JO, JM, and LH received funding from La Trobe University's ([www.latrobe.edu.au](http://www.latrobe.edu.au))  
33 ABC Internal Investment Scheme. The funders had no role in study design, data collection  
34 and analysis, decision to publish, or preparation of the manuscript

35

36 Author contributions:

37 Study conceptualisation: JM, JO, LH; Manuscript drafting: JO; Revision of manuscript and  
38 final version approval: JO, JM, LH, TG

39

40 Note: This protocol was accepted and presented at the Family Relationship Services Australia  
41 (FRSA) conference in May 2022.

42

43

44

## MERTIL FOR PARENTS: A STUDY PROTOCOL

45 **Background:** Early relational health is a key determinant of childhood development, while  
46 relational trauma in the parent-infant dyad can instigate a cascading pattern of infant risk.  
47 Fortunately, early relational trauma is detectable and modifiable. In 2018, Australian  
48 Maternal and Child Health (MCH) nurses participated in MERTIL (My Early Relational  
49 Trauma-Informed Learning), a program to identify and prevent relational trauma. Program  
50 evaluations revealed nurses felt competent and confident to identify and respond to relational  
51 trauma; however, response capacity was inhibited by inadequate parent referral options. In  
52 response, MERTIL *for Parents* (My Early Relational Trust-Informed Learning) was  
53 developed, which is an online, evidence-based, self-paced parenting program that focuses on  
54 enhancing parental knowledge of relational trust and its significance for infant development.  
55 This low-cost, accessible prevention resource targets emerging relational concerns to reduce  
56 later service system engagement. The potential for universal preventative online programs  
57 that target parental and relational wellbeing remains under-explored. This paper reports on a  
58 protocol for implementing a MERTIL *for Parents* pilot study describing nurses' and parents'  
59 perspectives on program feasibility and efficacy. **Methods:** This study is a mixed-methods,  
60 parallel-armed, uncontrolled, repeated measures design. We aim to recruit 48 Australian  
61 MCH nurses from the states of Victoria and New South Wales. These nurses will in turn  
62 recruit 480 parents with a child aged 0-5 years. All parents will receive MERTIL *for Parents*,  
63 which entails a 40-minute video, tipsheets, worksheets, and support resources. Parent data  
64 will be obtained at three periods: pre-program, program exit, and program follow-up. Nurse  
65 data will be collected at two periods: parent recruitment completion and program follow-up.  
66 Data collection will occur through surveys and focus groups. Primary parent outcomes will  
67 be socioemotional assessments of program efficacy. Nurses and parents will each report on  
68 study program feasibility. **Discussion:** This protocol describes the feasibility and efficacy of  
69 a new online parenting program, MERTIL *for Parents*, with pilot field studies commencing

## MERTIL FOR PARENTS: A STUDY PROTOCOL

70 in August 2022. We anticipate that this resource will be a valuable addition to various child  
71 and family services, for use in individual support and group work.

72 **Keywords:** *Relational trauma; online; parent program; feasibility; universal; maternal and*  
73 *child health; prevention; child.*

## MERTIL FOR PARENTS: A STUDY PROTOCOL

### 74 **Study Protocol Introduction**

75 Early relational health is a key determinant of childhood development, while relational  
76 trauma in the parent-infant dyad can instigate a cascading pattern of infant risk. Fortunately,  
77 early relational trauma is detectable and modifiable. In 2018, Australian Maternal and Child  
78 Health (MCH) nurses based in the state of Victoria participated in MERTIL (My Early  
79 Relational Trauma-Informed Learning), a program to identify and prevent relational trauma.  
80 Program evaluations revealed nurses felt competent and confident to identify and respond to  
81 relational trauma; however, response capacity was inhibited by inadequate parent referral  
82 options for those with sub-clinical presentations. In response, *MERTIL for Parents* (My  
83 Early Relational Trust-Informed Learning) was developed. *MERTIL for Parents* is an online,  
84 evidence-based, self-paced parenting program that focuses on enhancing parental knowledge  
85 of relational trust and its significance for infant development. This low cost, accessible  
86 prevention resource targets emerging relational concerns to reduce later service system  
87 engagement. The potential for universal preventative online programs that target parental and  
88 relational wellbeing, as well as the development of early relational trust, remains under-  
89 explored.

90 This protocol describes the feasibility and efficacy of a new online parenting program,  
91 *MERTIL for Parents*, describing MCH nurses' and parents' perspectives on program  
92 feasibility and efficacy, with pilot field studies soon to commence. This study is a mixed-  
93 methods, parallel-armed (i.e., MCH nurses and parents), uncontrolled, repeated measures  
94 design. We aim to recruit 48 MCH nurses who will in turn recruit 480 parents with a child  
95 aged 0-5 years (inclusive) displaying early signs of relational trauma. All participants will  
96 receive access to the *MERTIL for Parents* program, which entails a 40-minute video, tip  
97 sheets, worksheets, and support resources. Parent and nurse data collection will occur through  
98 surveys and focus groups. Primary parent outcomes will be socioemotional to examine

## MERTIL FOR PARENTS: A STUDY PROTOCOL

99 program efficacy; such outcomes will include child-parent relationship quality and parental  
100 reflective functioning. Nurses and parents will each report on study program feasibility. It is  
101 anticipated that this resource will be a valuable addition to a wide range of child and family  
102 services, for use in individual support and group work.

### 103 **Background**

104 Children develop in a relational context with everyday parent-child interactional patterns  
105 contributing to their *relational health* (1). Relational health in the infant-parent dyad is  
106 construed as parental security, trust, responsiveness, and sensitivity, which together form the  
107 cornerstone of socioemotional development. Alternatively, *relational trauma* presents  
108 ongoing and accruing disruptions to the infant's context of early care. Unsurprisingly,  
109 relational health and relational trauma impact upon an array of child developmental domains,  
110 instigating a cascading pattern of child resiliency or risk. Importantly, relational health  
111 elements, including attachment organisation and parental sensitivity (2-4) are modifiable, for  
112 better or worse. With this knowledge, promoting positive caregiving via psychoeducation and  
113 increased parenting capacity is important, enabling parents to promote child development,  
114 thereby affording their child the best start in life. Early parenting programs have been  
115 developed as a result.

### 116 **Preventative Parenting Programs**

117 Preventative parenting programs can be universal, selective, or indicated. Universal programs  
118 are those available to all parents; selective programs target parents displaying above average  
119 risk; and indicated programs target parents showing signs or symptoms of emerging disorder  
120 (5). Research has shown universal programs are well suited to mental health promotion,  
121 offering significant preventative public health benefit (6).

### 122 ***Universal face-to-face parenting programs***

## MERTIL FOR PARENTS: A STUDY PROTOCOL

123 Universal parenting skills-based programs have historically been presented through varied in-  
124 person modes, including face-to-face lectures, workshops, and groups. Program examples  
125 include CANparent (7) and *ACT Raising Safe Kids Program* (8). Such programs have been  
126 shown to increase both child and parent mental health among an array of domains such as  
127 parental self-efficacy, mental wellbeing, satisfaction, and child internalising and externalising  
128 presentations (e.g., 7, 8, 9).

129         Despite the availability and evidence supporting these in-person parenting programs,  
130 many families, particularly those experiencing numerous vulnerabilities, face multiple  
131 barriers in accessing these programs (10, 11). For parents who live in regional centres and  
132 rural or remote locations, attending in-person programs, typically city-based, is an  
133 accessibility obstacle. Transportation access is also an issue for in-person parent service  
134 participation (12, 13). Such programs are additionally cost prohibitive to many due to their  
135 high in-person contact hours with professionals (14). The inflexible structure of such  
136 programs and rigid delivery approaches can be perceived as stigmatising by the individuals  
137 these programs are intended to reach. Capped attendance due to physical room size,  
138 occupational health and safety concerns, and the limited number of facilitators running  
139 sessions provide further shortcomings. Parent logistical barriers, such as managing various  
140 daily work and lifestyle demands have resulted in low in-person parent program enrolment  
141 and poor program attendance for enrollees (e.g., 5, 15-17). Compounding these limitations,  
142 the COVID-19 pandemic saw an abrupt stop to most in-person treatment programs due to  
143 lockdowns and quarantine, severing preventative program resources at a time of heightened  
144 psychological vulnerability for parents and children alike (18).

### 145 ***Universal online parenting programs***

146 Online or app-based program delivery provides an avenue to address these limitations,  
147 provided intended users have adequate technology access, reliable internet connection, and

## MERTIL FOR PARENTS: A STUDY PROTOCOL

148 are digitally literate. Online universal parenting programs can be either entirely or partially  
149 self-guided. In partially self-guided programs, clinician support is provided at varying  
150 frequencies via online, phone, or in-person modalities (19). Prior meta-analytic research on  
151 the efficacy of self-guided and partially self-guided online parenting programs has reported  
152 benefits at the parent, child, and dyadic level. Specifically, at the parent level, programs have  
153 been shown to enhance elements such as positive parenting perceptions, behaviours,  
154 satisfaction, efficacy, and confidence, while lowering parental mental health problems (e.g.,  
155 anxiety, anger, depression, stress) and negative parenting practices (20-25). At the child level,  
156 programs decrease emotional and behavioural problems (21-23, 25), while at the relational  
157 level, they can reduce negative parent-child interactions (23), negative parental discipline  
158 strategies, and parental conflict (24).

159         While both self-guided and partially self-guided online parenting programs are  
160 efficacious, the formation and implementation of wholly self-guided, universal, digital  
161 parenting programs has recently gained momentum (e.g., 15, 26). The rapid uptake of such  
162 programs is particularly due to the ease of administration, scalability, sustainability, low-cost,  
163 and program standardisation. Further rationale for the uptake of online program delivery is  
164 due to the ubiquitous nature of internet access, allowing widescale dissemination. For  
165 example, 99% of Australians and 91% of Australian households have internet access (27),  
166 making this a delivery method that can reach most of the population, thus making these  
167 programs highly accessible. The self-directed nature of online programs may further allow  
168 parents to flexibly complete these programs in the security of their homes, thereby  
169 overcoming possible judgement and stigma felt from participating in in-person programs.  
170 Such benefits may in turn reduce costs and barriers to program engagement and enhance  
171 program reach.

## MERTIL FOR PARENTS: A STUDY PROTOCOL

172           Due to their significant preventative potential, online parent resources may reduce the  
173 need for later intervention. This may occur by supporting and motivating parents with new  
174 knowledge and behavioural skills to independently enhance their parent-child relationship, in  
175 turn reducing later burden on service systems. Public health initiatives such as these may  
176 empower parents to alter relational trajectories early on, within a preventative approach that  
177 is parent-led and strengths-based. This may assist to disrupt emerging disadvantage before  
178 reaching pathological thresholds. Equitable access through online platforms has become more  
179 important, particularly in the face of the COVID-19 global crisis. Further, evidence shows  
180 that these programs promote help-seeking (28). Finally, from a research perspective, fully  
181 online content allows for the collection and tracking of unique data on training progress,  
182 completion times, and premature program cessation. Such data can be linked to outcomes and  
183 inform program improvements.

### 184 **Knowledge Gaps**

185 While numerous clear benefits exist in relation to online, self-delivered, universal parenting  
186 programs, gaps remain. Currently, there are few brief self-help, psychoeducational, program  
187 options (in-person or online) suitable at the broad community level for parents where  
188 enhanced awareness of their role in promoting early relational trust may assist with  
189 prevention of relational trauma, especially in the face of challenge. Second, most parenting  
190 resources in this domain exist in the context of in-depth indicated parenting interventions  
191 (e.g., Parent-Child Psychotherapy; 1). While these indicated programs are essential for dyads  
192 in need of targeted treatment, there is a clear need for preventative education resources for  
193 parents in the wider community wishing to enhance their understanding of the parent-child  
194 relationship. This could act as an initial independent healthcare measure and reduce the need  
195 for later targeted measures. Further, outcomes of online parenting programs tend to focus on  
196 parents and, to a lesser extent, child outcomes (21, 24). Few studies have reported dyadic



## MERTIL FOR PARENTS: A STUDY PROTOCOL

197 outcomes and even fewer have reported familial outcomes associated with online parent  
198 program participation (e.g., 23). Finally, despite MCH nurses completing MERTIL and  
199 providing parenting support, they do not have a recommended suite of online parenting  
200 programs within their toolbox to assist clients (29). MCH service practice guidelines focus on  
201 health promotion, child development and to a lesser extent parent mental health; however,  
202 nurses need evidence-based interventions to enhance dyadic relationships. This study aims to  
203 address these resource and knowledge gaps.

### 204 **Methods**

#### 205 **Study aims**

206 This paper reports on a protocol for the pilot implementation of a new self-directed, online  
207 parenting program (*MERTIL for Parents*) within the Maternal and Child Health (MCH) and  
208 allied Early Childhood sector. The aims of this study are twofold:

- 209 1) Determine the feasibility of *MERTIL for Parents*:
  - 210 i. For MCH nurses and allied health professionals: Examine the programs  
211 acceptability and utility for enhancing parent understanding of early relational  
212 health; assess the practical dimension of implementing the program within a busy  
213 service; and explore population reach.
  - 214 ii. For parents: Examine program acceptability, efficacy, and utility.
- 215 2) Evaluate the short-term efficacy of the *MERTIL for Parents* program for parents across  
216 selected parental caregiver knowledge, perceptions (e.g., parenting confidence &  
217 competence), and behavioural domains (e.g., professional help-seeking amenability).

#### 218 **Intervention development**

219 *MERTIL for Parents* is a new universally available, self-directed, online psychoeducation  
220 resource for Australian parents focused on promoting parental knowledge and understanding  
221 of relational trust and its significance for infant development. This program is informed by

## MERTIL FOR PARENTS: A STUDY PROTOCOL

222 evidence from attachment theory, developmental neuroscience, and psychoanalysis. As a  
223 preventative early mental health resource, MERTIL *for Parents* aims to enhance infant-parent  
224 relational trust and relational awareness, in turn modifying parents' attachment security-  
225 oriented beliefs, attitudes, and behaviours. MERTIL *for Parents* builds upon prior research  
226 by the authors. In 2018, over 1700 Australian MCH nurses from the state of Victoria  
227 participated in MERTIL (My Early Relational Trauma-Informed Learning), a 14-hour self-  
228 directed, interactive, professional development program for MCH nurses to identify and  
229 prevent relational trauma. The MERTIL program evaluation from the 2018 Victorian cohort  
230 revealed that MERTIL enhanced competence and confidence in nurses' identification of  
231 relational trauma (30). However, capacity to respond to such identified early relational  
232 trauma was inhibited by inadequate referral options for parents, particularly in rural and  
233 remote settings. More broadly, it was identified that the potential for universal online  
234 programs that target the development of early relational trust remains under-explored (30). In  
235 response, MERTIL *for Parents* was developed, replacing the *trauma* in MERTIL *for trust*.  
236 See Fig 1 for the MERTIL *for Parents* logo.

237

238 Fig 1. MERTIL *for Parents* logo.

239 \*\*\*Insert Fig 1 here\*\*\*

### 240 **The Intervention**

#### 241 ***Intervention Content***

242 MERTIL *for Parents* is accessed via the internet and can be viewed on any online platform  
243 (i.e., phone, computer, or tablet). The primary component of MERTIL *for Parents* comprises  
244 a 40-minute pre-recorded video. Video content consists of four 'chapters', with each chapter  
245 approximately nine-minutes in duration. See Table 1 for a description of the MERTIL *for*  
246 *Parents* video content. Secondary program components include downloadable parent tip

## MERTIL FOR PARENTS: A STUDY PROTOCOL

247 sheets, parent worksheets, and professional support contacts. All secondary program elements  
248 will be developed by the study authors. See Table 2 for additional downloadable program  
249 resources. Participants progress through the varied program aspects at their own pace.

250

251 Table 1. MERTIL *for Parents* video content.

252 \*\*\*Insert Table 1\*\*\*

253

254 Table 2. Non-video MERTIL *for Parents* content

255 \*\*\*Inser Table 2 here\*\*\*

### 256 ***Program engagement***

257 Numerous steps were taken to ensure MERTIL *for Parents* is highly engaging, in order to 1)  
258 enhance program enrolment, 2) deliver memorable content, and 3) maximise successful  
259 program completion. MERTIL *for Parents* was intentionally designed as a very-brief  
260 parenting program, to counter the high dropout rates that have been observed in other online  
261 parenting programs (31). The rationale for MERTIL *for Parents*' length was to introduce  
262 parents to the pivotal elements of relational trust, in a manageable, user-friendly, and time-  
263 efficient fashion that could be completed in one sitting or across several brief stints. A  
264 production team and animator translated the content into an engaging, animated format. See  
265 Fig 2 for screenshots of the MERTIL *for Parents* content.

266

267 Fig 2. Screenshots from MERTIL *for Parents* video content.

268 \*\*\*Insert Fig 2 here\*\*\*

269

270 *Program content & delivery*

## MERTIL FOR PARENTS: A STUDY PROTOCOL

271 To ensure the evidence-based narrative content was engaging and well received, content  
272 included:

- 273 1. Occasional moments of humour to balance the program’s occasional heavy content.
- 274 2. Lay language to ensure the program’s content was successfully communicated to a varied  
275 parent audience,
- 276 3. An emphasis on safety, relatability, and acceptance; to this end, the narrator’s voice is  
277 warm, calm, non-blaming, and reassuring.

### 278 *Co-designed nature of MERTIL for Parents*

279 The MERTIL *for Parents* website ([www.mertil.com.au](http://www.mertil.com.au)) and all content within, was co-  
280 designed and co-developed alongside consumers, child infant mental health clinicians, and  
281 MCH nurses alike, from program commencement to completion. This collaborative process  
282 enabled the voice of ‘would be’ end-user parents and professional referrers to be heard; prior  
283 research has identified this co-design process as enhancing engagement, efficacy, and  
284 research applicability (32, 33). Researchers and clinicians engaged in a multiphase feedback  
285 process, culminating in the resultant MERTIL *for Parents* program.

### 286 **Design**

287 MERTIL *for Parents* will be examined via a parallel armed (i.e., nurses & parents),  
288 uncontrolled, mixed-methods, repeated measures study design. Nurses will complete two  
289 assessments (post-parent recruitment and three-month post-program) and parents will  
290 complete three assessments (pre-program, program exit, and three-month post-program). All  
291 nurse and parent data collection and completion will be conducted independently and in  
292 parallel.

### 293 **Participants**

294 Eligible study participants will be twofold: 1) Australian MCH nurses, and 2) Australian  
295 parents. See Fig 3 for an outline of all study participants.

## MERTIL FOR PARENTS: A STUDY PROTOCOL

### 296 **Eligibility criteria**

#### 297 *Nurses*

298 Nurses will i) have completed MERTIL, and ii) work at a participating pilot MCH site, in  
299 metropolitan and regional/rural Victorian and New South Wales Local Government Areas  
300 (LGAs) and iii) be able to make a follow-up phone call to each of the parents they refer to the  
301 program, to gather feedback. Three programs sit within the MCH umbrella: 1) Universal  
302 service, 2) Enhanced service and 3) 24-hour MCH Telephone Line (29). Participants will be  
303 comprised of Universal and Enhanced services MCH nurses. The Universal MCH service is  
304 available to all families, while the Enhanced MCH service supports families who meet strict  
305 ‘at-risk’ criteria, with limited places. Study participation invitations will be sent to MCH  
306 nurses who work in both the Universal and Enhanced MCH services. For nurses who decide  
307 to participate, free access to MERTIL (My Early Trauma-Informed Learning) will be  
308 provided for the duration of the pilot study. This is the training program MCH nurses  
309 completed in 2018 and will allow them to refresh their knowledge of and skills in identifying  
310 early relational trauma, if necessary. Nurses will also have ongoing access to MERTIL *for*  
311 *Parents*.

#### 312 *Parents*

313 Consenting parent participants will: i) be the parent of a child 0-5 years (inclusive) or  
314 currently pregnant, ii) be recommended to participate in the program by an MCH nurse from  
315 a participating pilot site, iii) aged 18 years and over, iv) currently reside in Australia, and v)  
316 feel comfortable to complete questionnaires and program materials in English.

### 317 **Sample size/power calculation**

318 Power analysis was conducted using the G\*Power 3.1 software to determine the required  
319 sample size for this study (34). A single group within study design would require 199  
320 participants to identify a small to moderate statistically significant effect (.20) at  $p < .05$ , with

## MERTIL FOR PARENTS: A STUDY PROTOCOL

321 80% power. To account for parent participant attrition, we aim to recruit approximately 480  
322 parents.

### 323 *Sample*

324 We aim to recruit 48 MCH nurses, consisting of 24 MCH nurses from the Universal MCH  
325 service and 24 MCH nurses from the Enhanced service. These nurses will in turn recruit the  
326 above-mentioned 480 parents.

327 Fig 3. MERTIL *for Parents* recruitment diagram.

328 \*\*\*Insert Fig 3\*\*\*

329

### 330 **Recruitment of study populations**

#### 331 *Nurse*

332 The authors will recruit through their existing MERTIL MCH nurse networks, ensuring a  
333 representative sample of MCH nurses from differing Australian geographic locations.

334 Participating MCH nurse sites will include four Victorian and New South Wales metropolitan  
335 LGAs and four Victorian and New South Wales regional/rural LGAs, based on pre-existing  
336 nurse networks. To further ensure representativeness, recruitment will include MCH nurses  
337 from the Universal and Enhanced MCH services. All participating MCH nurses will provide  
338 written online consent to their study participation.

#### 339 *Parents*

340 Parents who meet inclusion criteria will be informed about the study by their MCH nurse  
341 during a visit to the Universal service (any of the scheduled visits from the initial post-birth  
342 home visit, consultations at 2, 4, & 8 weeks; 4, 8, 12, & 18 months; 2 & 3.5 years), or a visit  
343 from the Enhanced service. The MCH nurse will explain MERTIL *for Parents* and the  
344 associated research project, and if the parent verbally expresses interest, nurses will direct  
345 them to the MERTIL *for Parents* website to register for the study and to access the materials

## MERTIL FOR PARENTS: A STUDY PROTOCOL

346 ([www.mertil.com.au](http://www.mertil.com.au)). Nurses will provide parents with a printed flyer with MERTIL *for*  
347 *Parents* details to aid this process. For parents who verbally agree to participate, MCH nurses  
348 will follow-up with a phone call or email, to gauge parents' responses to the program.

349 During the study pilot phase, all individuals who arrive at the MERTIL *for Parents*  
350 website landing page will be invited to join the research. Specifically, parents will be met  
351 with a webpage popup with a brief research overview and the option to hear more about the  
352 study. If they select to hear more about the research, they will be automatically prompted to  
353 enter their first name and email address. This will trigger emailing of consent forms. Once the  
354 completed forms are submitted, the pre-program parent survey will be automatically emailed  
355 to the participant. Completing this survey will grant parents access to the MERTIL *for*  
356 *Parents* program content.

### 357 **Procedure**

#### 358 *Nurses*

359 Following informed consent, MCH nurses will attend a 120-minute web-based information  
360 and training session on MERTIL *for Parents*. This session will provide a study overview to  
361 promote program familiarisation, discuss parent program engagement, and explain the  
362 implementation options for parents accessing both the Universal and Enhanced MCH  
363 services. Immediately following this session, nurses will be emailed and asked to complete an  
364 online survey to report their first impressions of MERTIL *for Parents* regarding factors such  
365 as perceived program content, length, and suitability.

366 Nurses will be asked to make contact (phone call preferred) with parents they referred  
367 to the program, within two weeks of recommending MERTIL *for Parents*. On completion of  
368 all parent recommendations, a follow-up email survey will be conducted, assessing program  
369 use, perceived parent impacts, program engagement, ideas for program refinement, and wider  
370 implementation. Online focus group interviews will follow to elaborate on survey responses,

## MERTIL FOR PARENTS: A STUDY PROTOCOL

371 assess nurses' views and experiences of the program, potential barriers to implementation,  
372 and to identify further uses and applications of MERTIL *for Parents*. These elements will  
373 ensure MERTIL *for Parents*' co-designed nature endures. See Fig 4 for the MCH nurse data  
374 collection flow diagram.

375 Fig 4. Flow diagram of MERTIL *for Parents* MCH nurse data collection timeline.

376 \*\*\*Insert Fig 4\*\*\*

### 377 ***Parents***

378 During the study pilot phase, all individuals who arrive at the MERTIL *for Parents* website  
379 landing page will be welcomed to the MERTIL *for Parents* pilot study and advised that the  
380 program is open to parents who are willing to participate in the research (but will be open to  
381 all following our test phase). They will be invited to read more about the study. If they  
382 consent, parents will provide their contact details to be emailed the Participant Information  
383 Statement and Participant Informed Consent Form. Once these forms are complete, the pre-  
384 program parent survey will be automatically electronically emailed to the parent participant.

385 The brief 10-minute survey before, after, and at 3-months follow-up comprises two  
386 sections: 1) close-ended questions, and 2) open-ended questions. Upon completion of Survey  
387 1, participants will be able to access the MERTIL *for Parents* program. Participants have  
388 program access for 2 months from consent completion. Immediately upon MERTIL *for*  
389 *Parents* main video completion, Survey 2 will be sent. As needed, survey reminders will be  
390 sent via email at 7- and 14-days after the initial survey. If participants do not complete  
391 surveys after these communication bids, no further contact will be made. Three-months after  
392 completion of MERTIL *for Parents*, a follow-up survey will be sent to explore sustained  
393 change; consenting parents will participate in a qualitative interview, to further identify lived  
394 experience, program strengths and weaknesses. See Fig 5 for an outline of parent data  
395 collection points.



## MERTIL FOR PARENTS: A STUDY PROTOCOL

396

397 Fig 5. Flow diagram of MERTIL *for Parents* parent data collection timeline.

398

\*\*\*Insert Fig 5\*\*\*

399

400 During this research and piloting phase, MERTIL *for Parents* will be free of charge to  
401 parents and caregivers who choose to participate in the research. Following this piloting  
402 phase and program refinement, MERTIL *for Parents* will be made broadly available.

### 403 **Measures**

404 Our primary outcome will be to determine the efficacy of MERTIL *for Parents* in enhancing  
405 socioemotional development. Secondary outcomes include evaluating the feasibility of  
406 implementing MERTIL *for Parents* within the Victorian and New South Wales MCH  
407 services.

### 408 ***Parents***

#### 409 *Baseline and three-month post-program questionnaires*

410 To evaluate program efficacy, participants will complete identical self-report measures pre-  
411 program and three-month post-program (see Table 3); noting that demographic questions  
412 would have been completed pre-program and will not be repeated. On both occasions parents  
413 will receive surveys through a secure weblink sent to their email address. Program efficacy  
414 questions will be both quantitative and qualitative in nature. Program efficacy will not be  
415 assessed at program exit as not enough time would have elapsed for meaningful parent  
416 change. All included measurement items were derived where possible from validated scales,  
417 single items from validated scales, and/or items from established clinical cohort studies (i.e.,  
418 Australian Temperament Project; Longitudinal Study of Australian Children). Table 3  
419 displays outcomes and associated measures that will be used to evaluate MERTIL *for Parents*  
420 pre- and post-program.

## MERTIL FOR PARENTS: A STUDY PROTOCOL

- 421 1. Parental distress (depression & anxiety): The *Patient Health Questionnaire-4* (PHQ4;  
422 35) will measure parent distress, with the two subscales measuring depression and  
423 anxiety.
- 424 2. Parenting practices: Parenting practices will be assessed by three parenting  
425 dimensions: hostile parenting (4 items), parental warmth (4 items), and parental self-  
426 efficacy (1 item; 36, 37).
- 427 3. Social support: the *Maternity Social Support Scale* (MSSS; 38) will determine  
428 parents' perceptions of support. Item wording will be modified so items are applicable  
429 to all caregivers.
- 430 4. Intimate partner safety: The *Family Law DOORS* (FL-DOORS; 39) will measure  
431 partner safety via one item.
- 432 5. Parenting experiences: Select items from the *Perinatal Emotional Growth Index*  
433 (PEGI; 40) will assess parenting experiences. Seven items will assess parental  
434 confidence (2 items), parenting satisfaction (1 item), parental agitation (2 items), and  
435 general reflective capacity (2 items).
- 436 6. Relational attunement: The Interest-Curiosity subscale from the *Parental Reflecting*  
437 *Functioning Questionnaire* (PRFC; 41) will measure parents' interest and curiosity in  
438 their child's mental states. Two further study-generated questions will assess a  
439 parent's capacity to respond to their child's cues: 1) 'I have built trust with my child'  
440 and 2) 'I know how to respond to my child's signals'. Response ranges from 1  
441 (completely true) - 5 (completely untrue).
- 442 7. Parent-child attachment: The Quality of Attachment subscale from the *Maternal*  
443 *Postnatal Attachment Scale* (MPAS; 42) will measure the quality of parent-child  
444 attachment. Item wording will be modified so items are applicable to all caregivers.

## MERTIL FOR PARENTS: A STUDY PROTOCOL

445 8. Professional help-seeking amenability: A study-specific item was developed by the  
446 authors (JM & JO) to assess parent’s help-seeking capacity: ‘I feel able to find and  
447 use support from other services in the community?’ with ratings from 1 (not at all) -10  
448 (definitely).

449

450 Table 3. Pre- and post-MERTIL *for Parents* self-report outcomes, measures, & completion  
451 time.

452 \*\*\*Insert Table 3\*\*\*

453 Parents’ online program usage data will further be automatically collected via the MERTIL  
454 *for Parents* website. This will record program engagement and completion elements such as  
455 1) program completion rates, 2) number of access occasions, 3) program components  
456 most/least accessed.

457 In addition to the above items, in the pre-program and three-months post-program  
458 questionnaires, parents will be asked open-ended free-text response questions relating to the  
459 program. Pre-program questions will cover hopes for learning, and three-month post-program  
460 feedback questions will include items on program components that parents found most  
461 useful.

462 Embedded within this study is an internal program evaluation consisting of multiple-  
463 choice questions and open-ended text-response questions. Specifically, upon program exit  
464 (data collection time two) parents will be asked to complete a five-minute survey relating to  
465 program usability and program satisfaction. Example questions asked include: 1) *How useful*  
466 *was the program for you, as a parent of a young child?* and 2) *What was most helpful about*  
467 *MERTIL for Parents?* This will be sent to parents via email with an attached secure link.

468 *Nurses*

## MERTIL FOR PARENTS: A STUDY PROTOCOL

469 After hearing from their parent participants, nurses will be asked to complete a brief mixed-  
470 method online survey, allowing insight into nurse perceptions of the program. Questions will  
471 include: 1) *Would you recommend MERTIL for Parents to future clients/patients?* 2) *Would*  
472 *you recommend colleagues encourage suitable clients/patients to participant in MERTIL for*  
473 *Parents?* 3) *From your perspective, does MERTIL for Parents fill a current preventative*  
474 *health gap?* 4) *Are there any existing gaps in the MERTIL for Parents program?* For each  
475 question response options will be ‘yes’ or ‘no’, and then participants will be asked to expand  
476 upon their answer with free text.

### 477 **Focus groups**

478 To further examine the feasibility and efficacy of MERTIL *for Parents*, focus groups will be  
479 held upon program completion. Each group will consist of 4-6 parents or nurses. A semi-  
480 structured interview schedule will guide focus group discussions. All focus groups will be  
481 audio recorded to allow for later transcription and analysis.

### 482 **Nurse**

483 Example focus group questions will include: 1) *Could you tell us about your MERTIL for*  
484 *Parents experience?* 2) *What was most relevant to you?* 3) *Can you see yourself in the future*  
485 *encouraging suitable parents to participate in MERTIL for Parents as a first intervention*  
486 *step?* (3) *What are the long-term and short-term implications of programs such as MERTIL*  
487 *for Parents?*

### 488 **Parent**

489 Example focus group questions will include: 1) *Could you tell us what it was like to*  
490 *participate in MERTIL for Parents?* 2) *Since completing MERTIL for Parents, what, if*  
491 *anything, has changed in your thinking, or feeling, or in your behaviour as a parent?* 3) *In*  
492 *MERTIL for Parents, what was most relevant to you?* 4) *Would you recommend MERTIL for*  
493 *Parents to other parents?*

## MERTIL FOR PARENTS: A STUDY PROTOCOL

### 494 **Program data management**

495 All MCH nurse and parent survey data will be disseminated through Moodle, an online  
496 learning management system stored on a secure server, with data transferred securely for  
497 analyses. All study data and participant information will be stored securely as per the criteria  
498 required by the La Trobe University Human Ethics Committee.

### 499 **Data analysis strategy**

#### 500 *Quantitative*

501 All statistical analyses will be conducted using the software IBM SPSS Statistics (43).  
502 Descriptive statistics will be generated to identify nurse and parent population characteristics  
503 and to evaluate parent and nurse program perceptions. To determine parenting change in dyad  
504 attachment, relational function, maternal mental health, from pre-program to three-months  
505 post-program, inferential statistics will be used (i.e., univariate, bivariate, and multivariate  
506 analyses) such as t-tests, chi-squared analyses, ANOVA, and regression analyses.

#### 507 *Qualitative*

##### 508 *Focus groups*

509 All parent and nurse focus group interview data will be audio-recorded, transcribed verbatim,  
510 and deidentified. Thematic and content analysis will be used to identify themes and sub-  
511 themes from MCH nurse and parent transcript responses (44).

##### 512 *Free-text surveys responses*

513 For any nurse or parent free-text survey responses, thematic analysis will also be used to  
514 identify response themes and sub-themes.

### 515 **Data collection commencement**

516 Pilot field studies, including recruitment and data collection, will commence in August 2022  
517 with data collection concluding in November 2022.

### 518 **Discussion**

## MERTIL FOR PARENTS: A STUDY PROTOCOL

### 519 **Limitations and challenges**

520 While this study is innovative, we foresee several program content and delivery method  
521 limitations: Firstly, it is possible that the brief self-guided content of *MERTIL for Parents*  
522 may not provide parents with adequate content information and support (i.e., program dose  
523 too low). Second, as a frontline service, MCH nurses may lack the time in session to explain  
524 and recommend suitable parents to participate in *MERTIL for Parents*, due to competing  
525 demands and scheduling pressures. Third, as the study population pertains only to nurses and  
526 parents located in Victoria and New South Wales, Australia, generalisability concerns will be  
527 present for inter-state Australian and international populations. Fourth, as all *MERTIL for*  
528 *Parents* content is housed online, this may exclude those who lack the technology or skills to  
529 participate, especially as on-demand technical support will not be available for live  
530 participant trouble shooting. Further, because of this study's non-randomised sampling  
531 strategy, cause-effect relationships cannot be drawn. That is, parents' socioemotional  
532 outcome changes cannot be causally inferred by their *MERTIL for Parents* participation.  
533 Finally, as with all research, there is a risk that attrition rates may be high. All parent data  
534 will be self-report in nature, and interpretation of findings will therefore be subject to these  
535 limitations.

### 536 **Strengths and opportunities**

537 There are multiple strengths to the present study: First, the mixed-methods design of this  
538 study allows for greater understanding of the program's impact compared with either  
539 qualitative- or quantitative-only designs. Second, diversity of parent demographics and needs  
540 will be ensured through recruitment of participants from both the Universal and Enhanced  
541 MCH services in both metropolitan and regional locations. Third, socioemotional-specific  
542 content may fill an important gap in the available online parenting program market. Fourth,  
543 the program's reach is expected to be wide due to the online delivery method. Finally, strong

## MERTIL FOR PARENTS: A STUDY PROTOCOL

544 completion is expected due to 1) the program’s brief nature, 2) the engaging, non-  
545 judgemental, and supportive program content; and 3) the contribution of MCH nurses, infant  
546 mental health experts, and parents in co-designing the program.

### 547 **Conclusion**

548 This study will examine implementation feasibility and efficacy of an evidence-based, online,  
549 universal, self-directed parenting program, MERTIL *for Parents*. Multi-informant data from  
550 parents and nurses will inform future iterations of MERTIL *for Parents* and universal online  
551 relational programs.

552

553 **Acknowledgements:** We wish to thank the maternal child health nurses, early childhood  
554 mental health clinicians, and parents who co-designed MERTIL *for Parents*.

555

556 **Data availability statement:** Not applicable as data collection has not commenced. Once all  
557 study data is collected, the data supporting the findings of this study will be available from  
558 the corresponding author, JO, upon reasonable request.

559

560

561

562

563

564

565

566

567

568

## MERTIL FOR PARENTS: A STUDY PROTOCOL

569

570

571

### References

572 1. Lieberman AF, Ippen CG, Van Horn P. Don't hit my mommy! A manual for child-  
573 parent psychotherapy with young children exposed to violence and other trauma.

574 Washington, DC: Zero to Three; 2015.

575 2. Bakermans-Kranenburg MJ, van IJzendoorn MH, Juffer F. Less is more: Meta-  
576 analyses of sensitivity and attachment interventions in early childhood. *Psychological*  
577 *Bulletin*. 2003;129(2):195-215.

578 3. Opie JE, McIntosh JE, Esler TB, Duschinsky R, George C, Schore A, et al. Early  
579 childhood attachment stability and change: A meta-analysis. *Attachment & Human*  
580 *Development*. 2021;23(6):897-930.

581 4. Perrone L, Imrisek SD, Dash A, Rodriguez M, Monticciolo E, Bernard K. Changing  
582 parental depression and sensitivity: Randomized clinical trial of ABC's effectiveness in the  
583 community. *Development and Psychopathology*. 2021;33(3):1026-40.

584 5. Baker CN, Arnold DH, Meagher S. Enrollment and attendance in a parent training  
585 prevention program for conduct problems. *Prevention Science: The Official Journal of the*  
586 *Society for Prevention Research*. 2011;12(2):126-38.

587 6. Arango C, Díaz-Caneja CM, McGorry PD, Rapoport J, Sommer IE, Vorstman JA, et  
588 al. Preventive strategies for mental health. *The Lancet Psychiatry*. 2018;5(7):591-604.

589 7. Lindsay G, Totsika V. The effectiveness of universal parenting programmes: The  
590 CANparent trial. *BMC Psychology*. 2017;5(1):35.

591 8. Altafim ERP, McCoy DC, Linhares MBM. Unpacking the impacts of a universal  
592 parenting program on child behavior. *Child Development*. 2021;92(2):626-37.



## MERTIL FOR PARENTS: A STUDY PROTOCOL

- 593 9. Salari R, Enebrink P. Role of universal parenting programs in prevention. In: Sanders  
594 MR, Morawska A, editors. Handbook of Parenting and Child Development Across the  
595 Lifespan. Cham: Springer; 2018. p. 713-43.
- 596 10. Koerting J, Smith E, Knowles MM, Latter S, Elsey H, McCann DC, et al. Barriers to,  
597 and facilitators of, parenting programmes for childhood behaviour problems: a qualitative  
598 synthesis of studies of parents' and professionals' perceptions. *European Child & Adolescent*  
599 *Psychiatry*. 2013;22(11):653-70.
- 600 11. Mytton J, Ingram J, Manns S, Thomas J. Facilitators and barriers to engagement in  
601 parenting programs: A qualitative systematic review. *Health Education & Behavior*:  
602 The official publication of the Society for Public Health  
603 Education. 2014;41(2):127-37.
- 604 12. Berthelsen D, Williams K, Abad V, Vogel L, Nicholson J. The Parents at Playgroup  
605 research report: Engaging families in supported playgroups 2012. Brisbane: Queensland  
606 University of Technology; Playgroup Association of Queensland; 2012.
- 607 13. Oke N, Stanley J, Theobald J. The inclusive role of playgroups in Greater Dandenong.  
608 Melbourne, Australia: Brotherhood of St. Laurence; 2007.
- 609 14. Kazdin AE. Annual Research Review: Expanding mental health services through  
610 novel models of intervention delivery. *Journal of Child Psychology and Psychiatry*.  
611 2019;60(4):455-72.
- 612 15. Breitenstein SM, Gross D, Christophersen R. Digital delivery methods of parenting  
613 training interventions: A systematic review. *Worldviews on Evidence-Based Nursing*.  
614 2014;11(3):168-76.
- 615 16. Breitenstein SM, Gross D, Fogg L, Ridge A, Garvey C, Julion W, et al. The Chicago  
616 Parent Program: Comparing 1-year outcomes for African American and Latino parents of  
617 young children. *Research in Nursing & Health*. 2012;35(5):475-89.

## MERTIL FOR PARENTS: A STUDY PROTOCOL

- 618 17. Thornton S, Calam R. Predicting intention to attend and actual attendance at a  
619 universal parent-training programme: A comparison of social cognition models. *Clinical*  
620 *Child Psychology and Psychiatry*. 2011;16(3):365-83.
- 621 18. Spinelli M, Lionetti F, Pastore M, Fasolo M. Parents' stress and children's  
622 psychological problems in families facing the COVID-19 outbreak in Italy. *Frontiers in*  
623 *Psychology*. 2020;11:1713.
- 624 19. Tully LA, Piotrowska PJ, Collins DAJ, Mairet KS, Black N, Kimonis ER, et al.  
625 Optimising child outcomes from parenting interventions: fathers' experiences, preferences  
626 and barriers to participation. *BMC Public Health*. 2017;17(1):550.
- 627 20. Baumel A, Pawar A, Kane JM, Correll CU. Digital parent training for children with  
628 disruptive behaviors: Systematic review and meta-analysis of randomized trials. *Journal of*  
629 *Child and Adolescent Psychopharmacology*. 2016;26(8):740-9.
- 630 21. Florean IS, Dobrean A, Păsărelu CR, Georgescu RD, Milea I. The efficacy of  
631 internet-based parenting programs for children and adolescents with behavior problems: A  
632 meta-analysis of randomized clinical trials. *Clinical Child and Family Psychology Review*.  
633 2020;23(4):510-28.
- 634 22. Fluja-Contreras JM, García-Palacios A, Gómez I. Technology-based parenting  
635 interventions for children's physical and psychological health: A systematic review and meta-  
636 analysis. *Psychological Medicine*. 2019;49(11):1787-98.
- 637 23. Opie JE, Clancy E, Painter F, Vuong A, Booth AT, Esler TB, et al. Universal digital  
638 parent education programs for supporting early parent-child relational health: A systematic  
639 review, meta-analysis, and qualitative examination. [Manuscript in preparation]. In press  
640 2022.
- 641 24. Spencer CM, Topham GL, King EL. Do online parenting programs create change?: A  
642 meta-analysis. *Journal of Family Psychology*. 2020;34(3):364-74.

## MERTIL FOR PARENTS: A STUDY PROTOCOL

- 643 25. Thongseiratch T, Leijten P, Melendez-Torres GJ. Online parent programs for  
644 children's behavioral problems: A meta-analytic review. *European Child & Adolescent*  
645 *Psychiatry*. 2020;29(11):1555-68.
- 646 26. Nunes C, Martins C, Brás M, Carmo C, Gonçalves A, Pina A. Impact of an Online  
647 Parenting Support Programme on Children's Quality of Life. *Children (Basel)*. 2022;9(2):173.
- 648 27. Australian Communications and Media Authority. *Communications and media in*  
649 *Australia: How we use the internet*. 2021.
- 650 28. Licheni SH, Devaraja L, Watson B, Simeonovic M, Cheng DR, Hoq M, et al. Impact  
651 of COVID-19 public health restrictions on hospital admissions for young infants in Victoria,  
652 Australia. *Journal of Paediatrics and Child Health*. 2022;58(6):1001-6.
- 653 29. Department of Health and Human Services. *Maternal and Child Health Service*  
654 *Guidelines*. 2019.
- 655 30. Clancy EM, McIntosh J, Booth AT, Sheen J, Johnson M, Gibson T, et al. Training  
656 maternal and child health nurses in early relational trauma: An evaluation of the MERTIL  
657 workforce training. *Nurse Education Today*. 2020;89:104390.
- 658 31. Hall CM, Bierman KL. Technology-assisted interventions for parents of young  
659 children: Emerging practices, current research, and future directions. *Early Childhood*  
660 *Research Quarterly*. 2015;33:21-32.
- 661 32. Slattery P, Saeri AK, Bragge P. Research co-design in health: A rapid overview of  
662 reviews. *Health Research Policy and Systems*. 2020;18(1):1-13.
- 663 33. Thabrew H, Fleming T, Hetrick S, Merry S. Co-design of eHealth Interventions With  
664 Children and Young People. *Frontiers in Psychiatry*. 2018;9:481.
- 665 34. Faul F, Erdfelder E, Lang AG, Buchner A. G\*Power 3: A flexible statistical power  
666 analysis program for the social, behavioral, and biomedical sciences. *Behavior Research*  
667 *Methods*. 2007;39(2):175-91.

## MERTIL FOR PARENTS: A STUDY PROTOCOL

- 668 35. Kroenke KMD, Spitzer RLMD, Williams JBWDSW, Löwe BMDPD. An ultra-brief  
669 screening scale for anxiety and depression: The PHQ-4. *Psychosomatics*. 2011;50(6):613-21.
- 670 36. Paterson G, Sanson A. The association of behavioural adjustment to temperament,  
671 parenting and family characteristics among 5-year-old children. *Social Development*.  
672 1999;8(3):293-309.
- 673 37. Zubrick SR, Lucas N, Westrupp EM, Nicholson JM. Parenting measures in the  
674 Longitudinal Study of Australian Children: Construct validity and measurement quality,  
675 Waves 1 to 4. LSAC technical paper. 2014;12:1-110.
- 676 38. Webster J, Linnane JWJ, Dibley LM, Hinson JK, Starrenburg SE, Roberts JA.  
677 Measuring social support in pregnancy: Can it be simple and meaningful? *Birth* (Berkeley,  
678 Calif). 2000;27(2):97-101.
- 679 39. McIntosh J. DOOR 1: Parent self-report form. In: McIntosh J, Ralfs C, editors. *The*  
680 *family law DOORS handbook*. Canbtment2011. p. 25-9.
- 681 40. McIntosh J, The Centre for Social and Early Emotional Development. *The*  
682 *development of the Perinatal Emotional Growth Index (PEGI)*. [Manuscript in preparation.].  
683 In press 2022.
- 684 41. Luyten P, Mayes LC, Nijssens L, Fonagy P. The parental reflective functioning  
685 questionnaire: Development and preliminary validation. *PLOS One*. 2017;12(5):e0176218.
- 686 42. Condon JT, Corkindale CJ. The assessment of parent-to-infant attachment:  
687 Development of a self-report questionnaire instrument. *Journal of Reproductive and Infant*  
688 *Psychology*. 1998;16(1):57-76.
- 689 43. IBM Corp. *IBM SPSS Statistics for MacIntosh, Version 27.0*. Armonk, NY: IBM  
690 Corp; 2020.
- 691 44. Braun V, Clarke V. Using thematic analysis in psychology. *Qualitative Research in*  
692 *Psychology*. 2006;3(2):77-101.

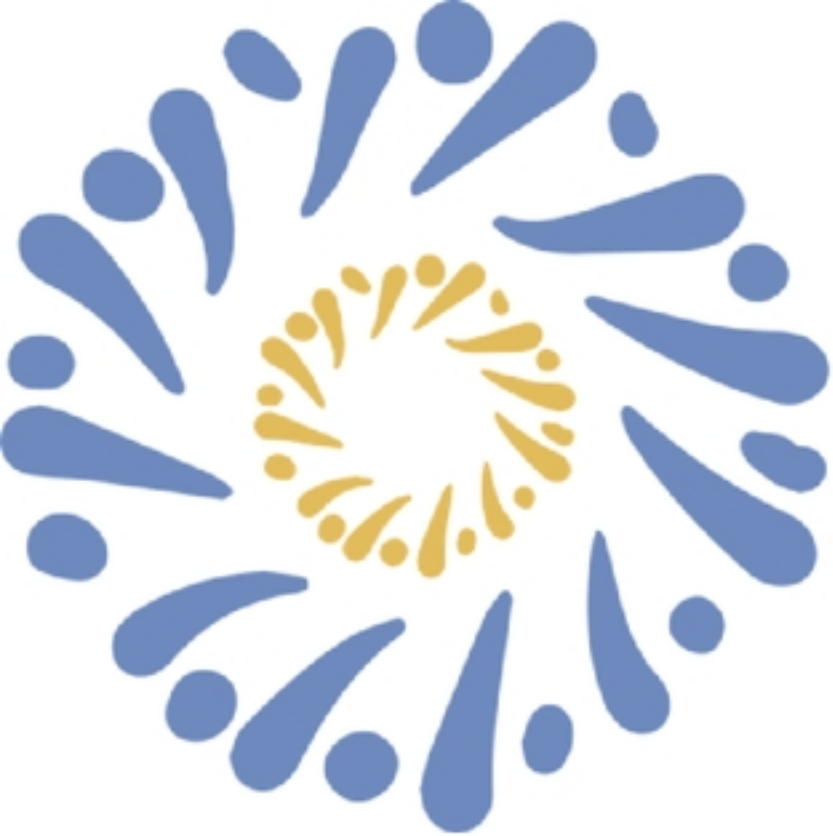

# meritiil

MY EARLY RELATIONAL TRUST INFORMED LEARNING

For Parents

Fig 1



**This program is for you if you:**  
want to know more about  
your baby's mind and feelings,  
and your role in creating trust

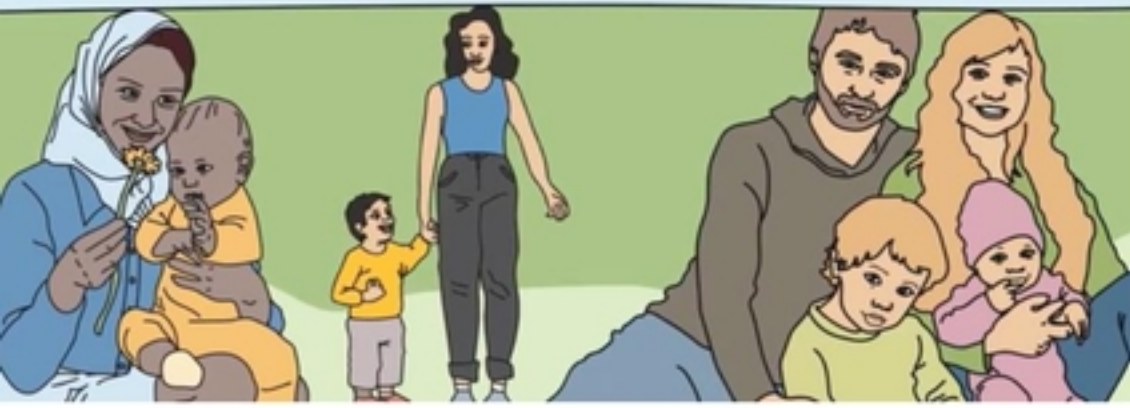

???

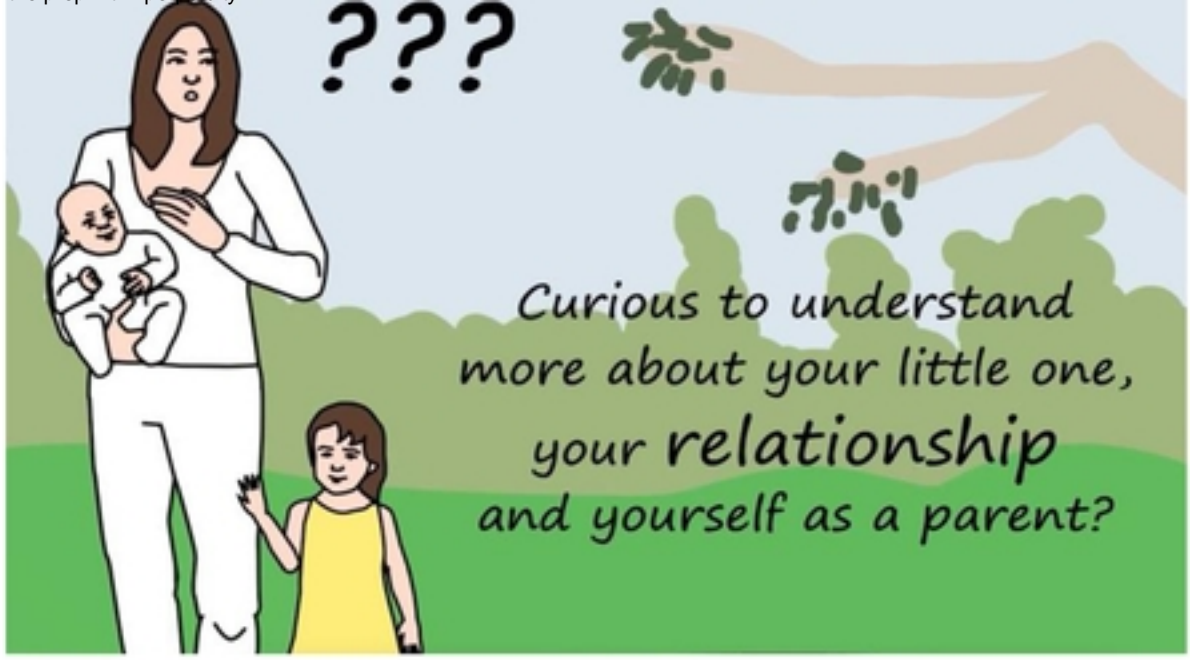

Curious to understand  
more about your little one,  
your relationship  
and yourself as a parent?

Trust means that you will recognise  
their effort to communicate  
They trust you  
to meet their needs

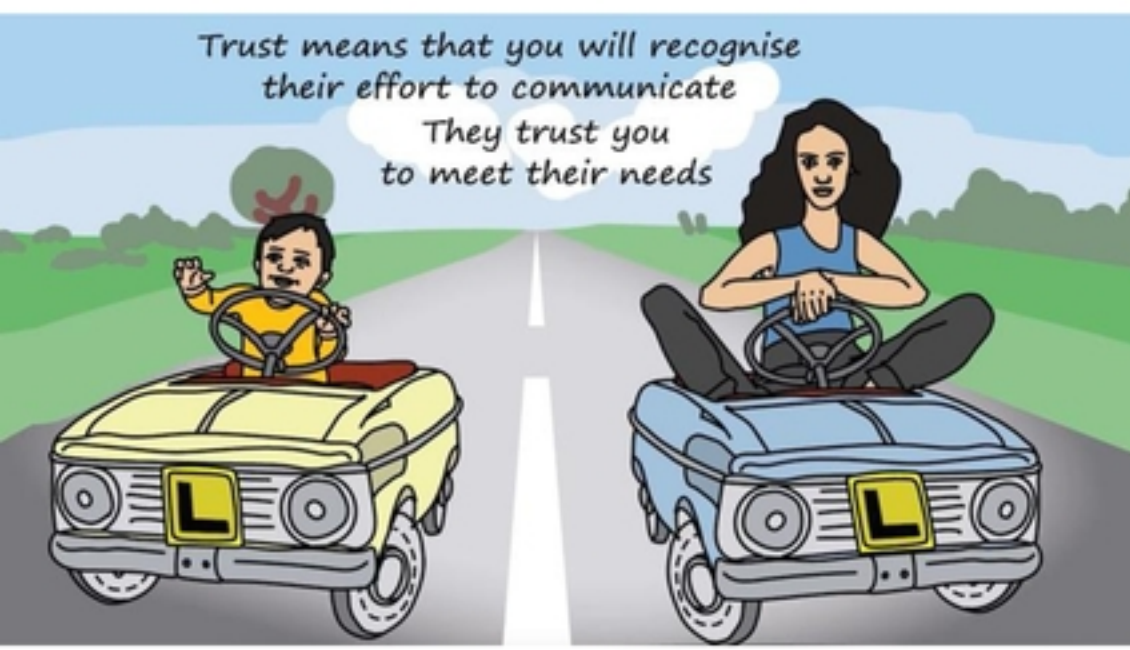

Trust means  
that a baby is learning  
that they are:  
safe to feel all  
their feelings

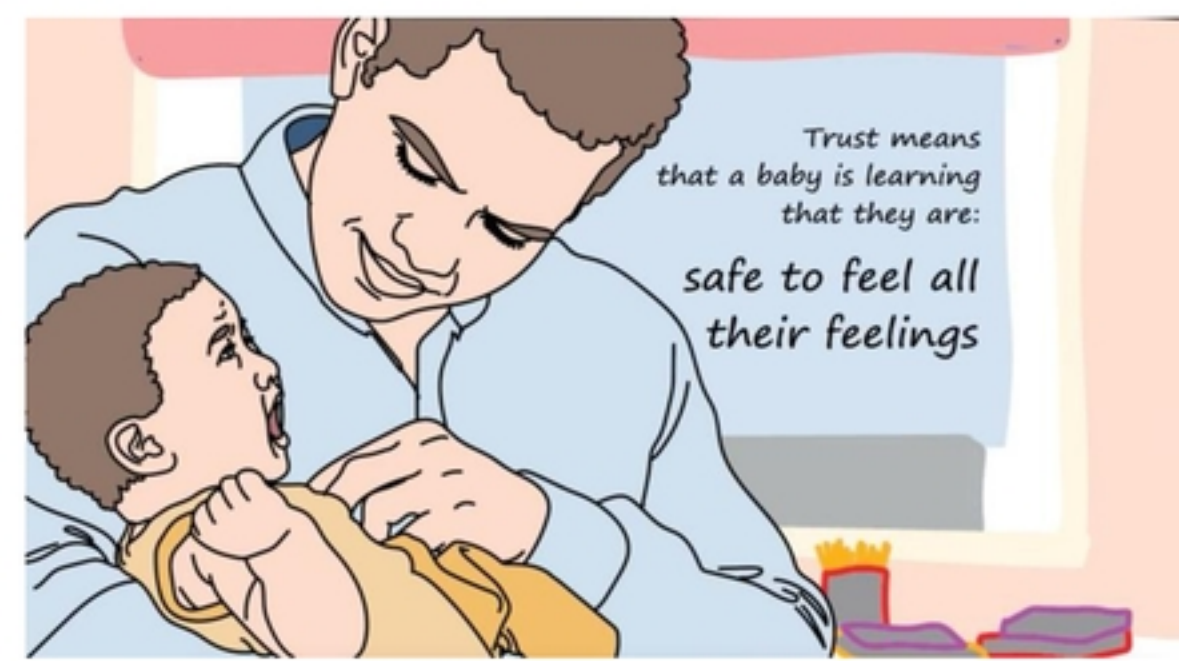

You build trust with your baby  
every single time you  
"hear what they are trying to tell you",  
respond warmly, and help them  
manage their feelings

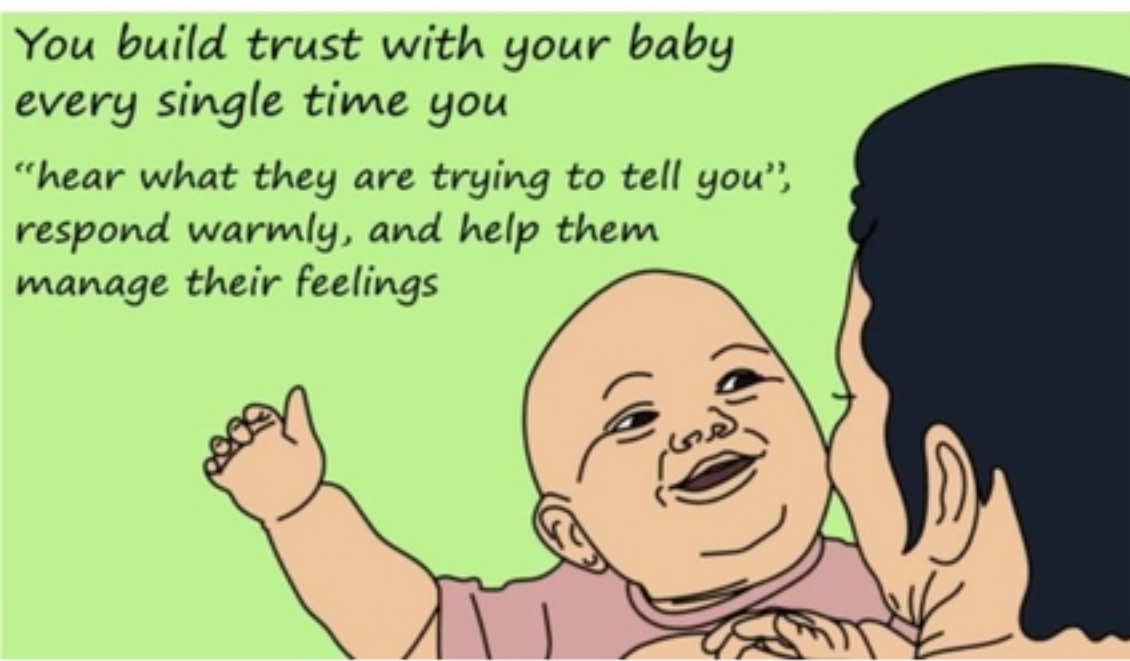

Try to hang  
onto the  
idea of being

"The  
good-enough  
parent."

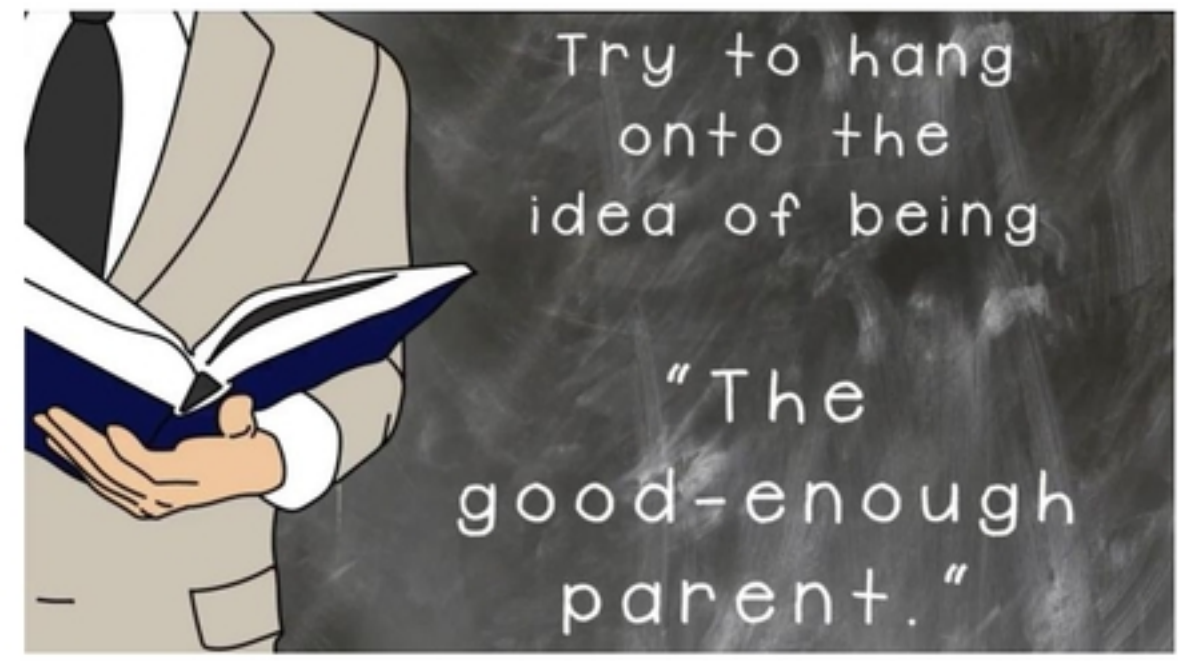

Fig 2

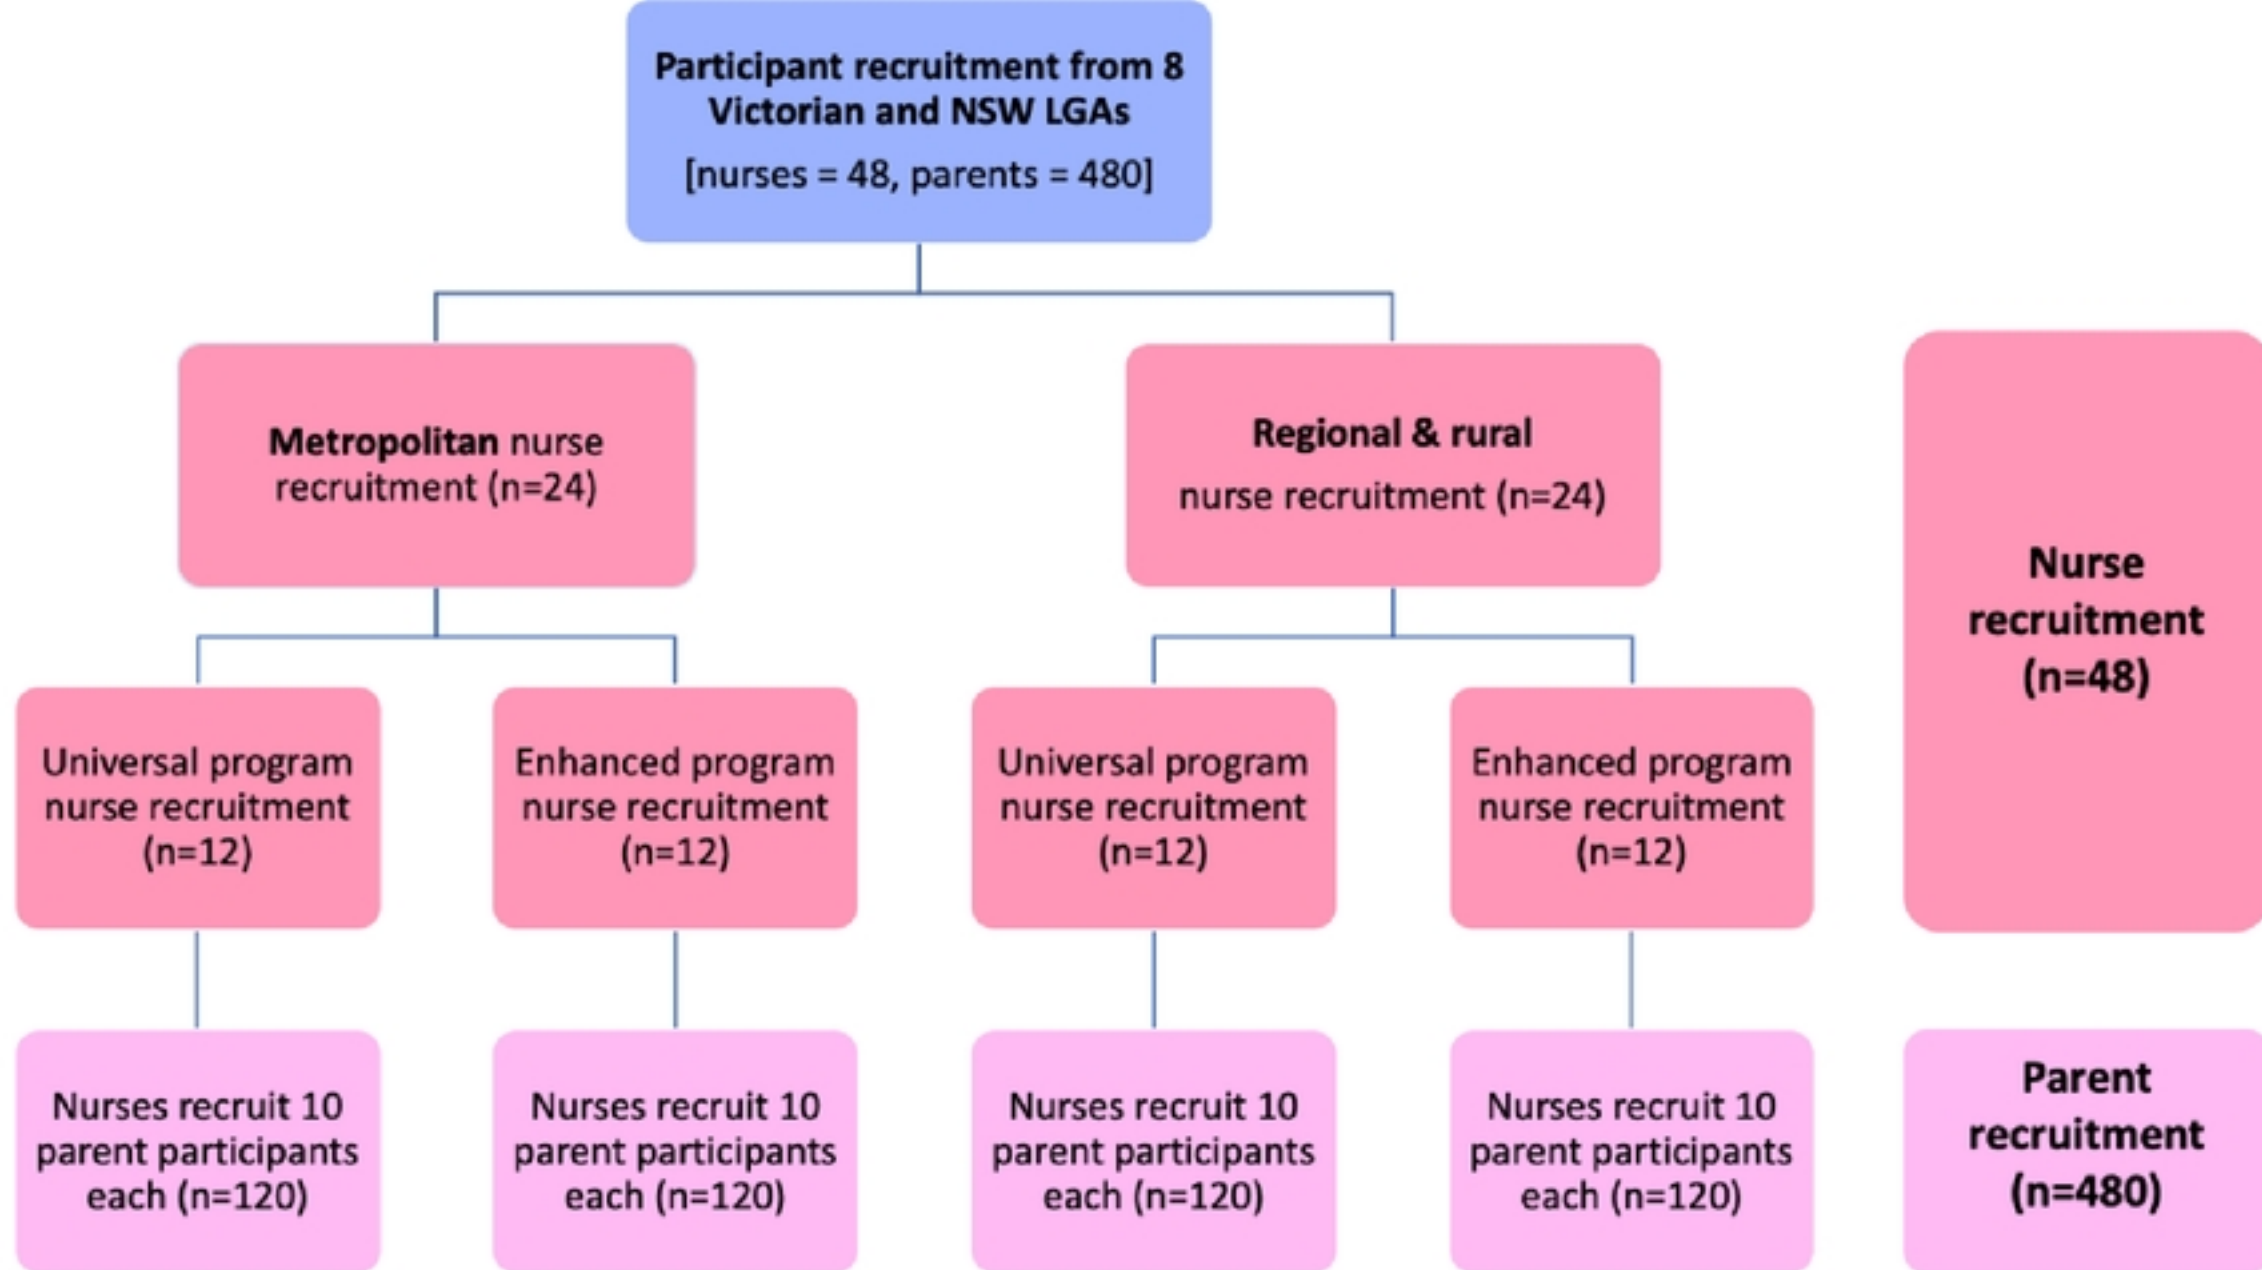

*Note.* LGAs = Local Government Areas; NSW = New south Wales.

Fig 3



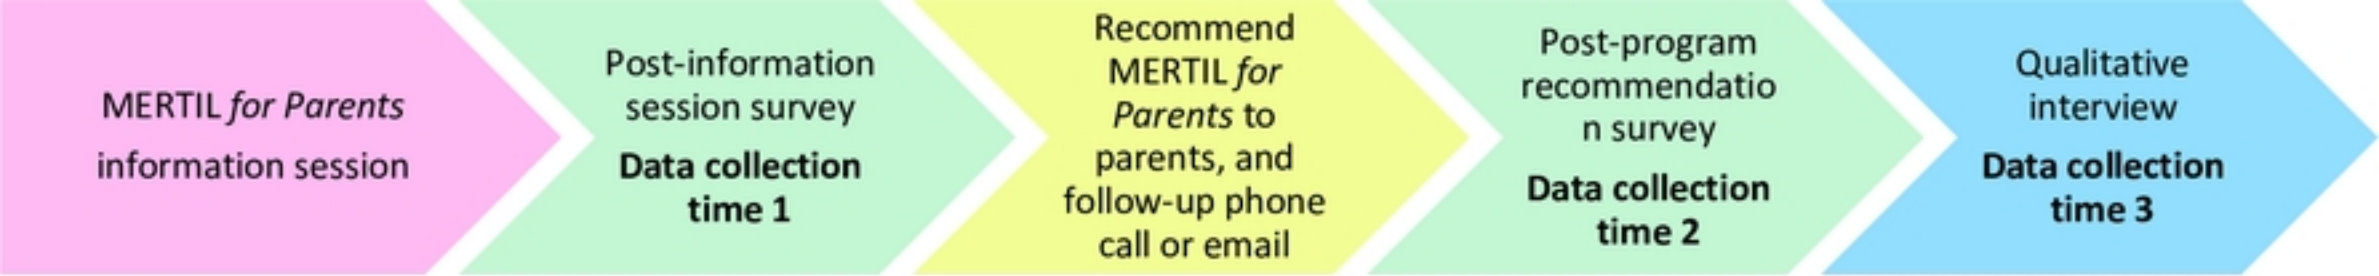

Fig 4



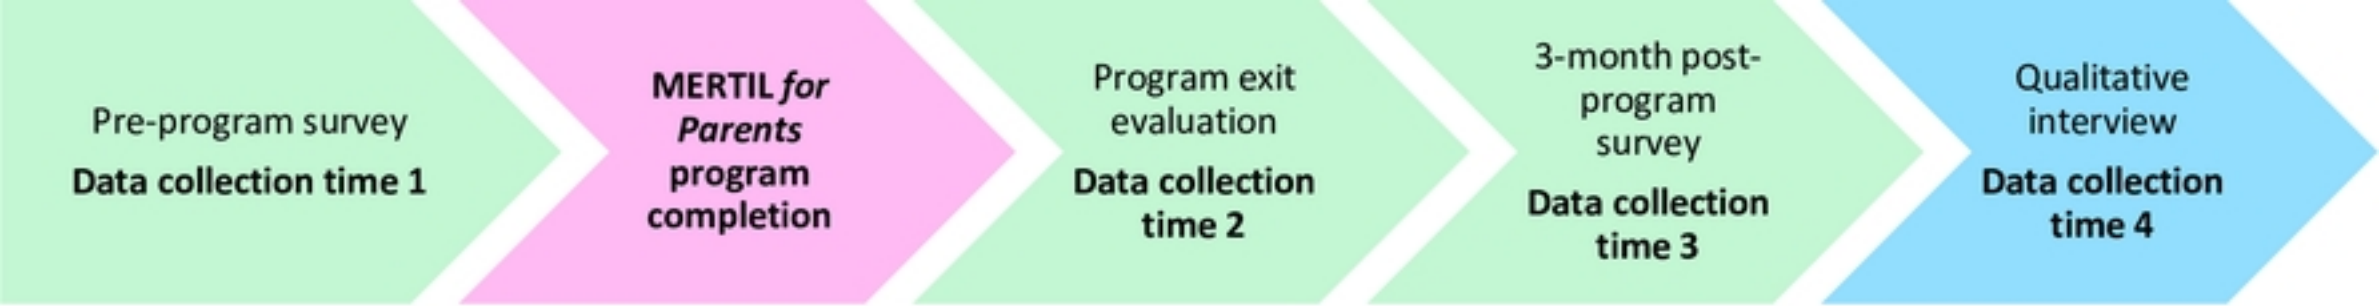

Fig 5
